# Supplementary material
Source: publisher figshare collection journal article supplement (https://acs.figshare.com/ndownloader/files/4356910)
Supplement: Supplementary file 1 [file 4356910]

### Additional file 3. Identification of F1-ATPase protein by PMF and MS/MS

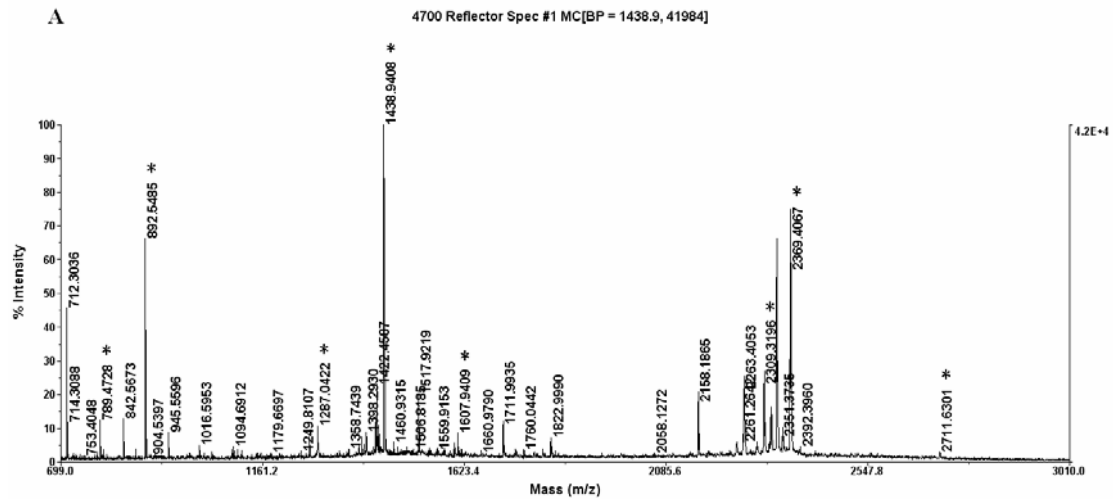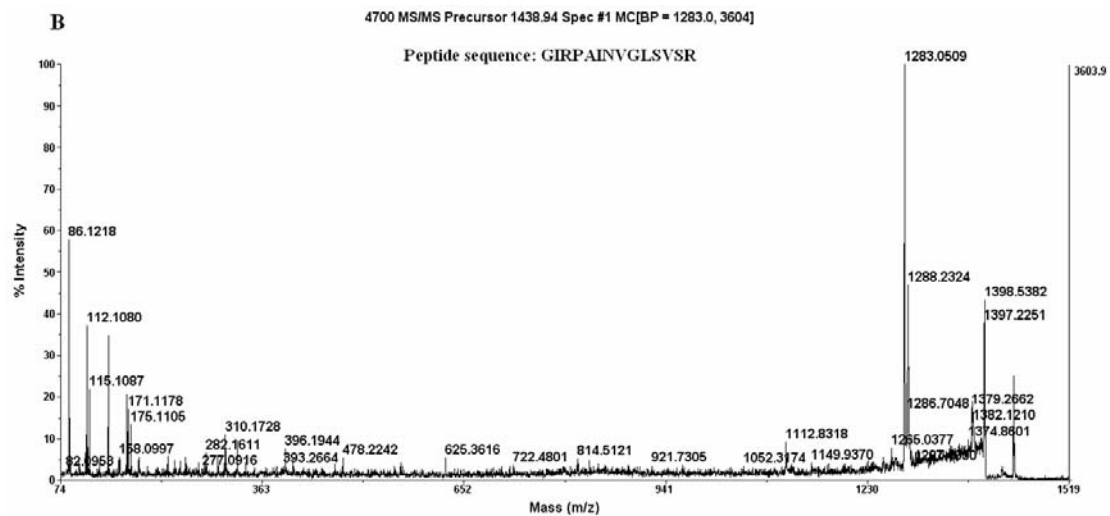

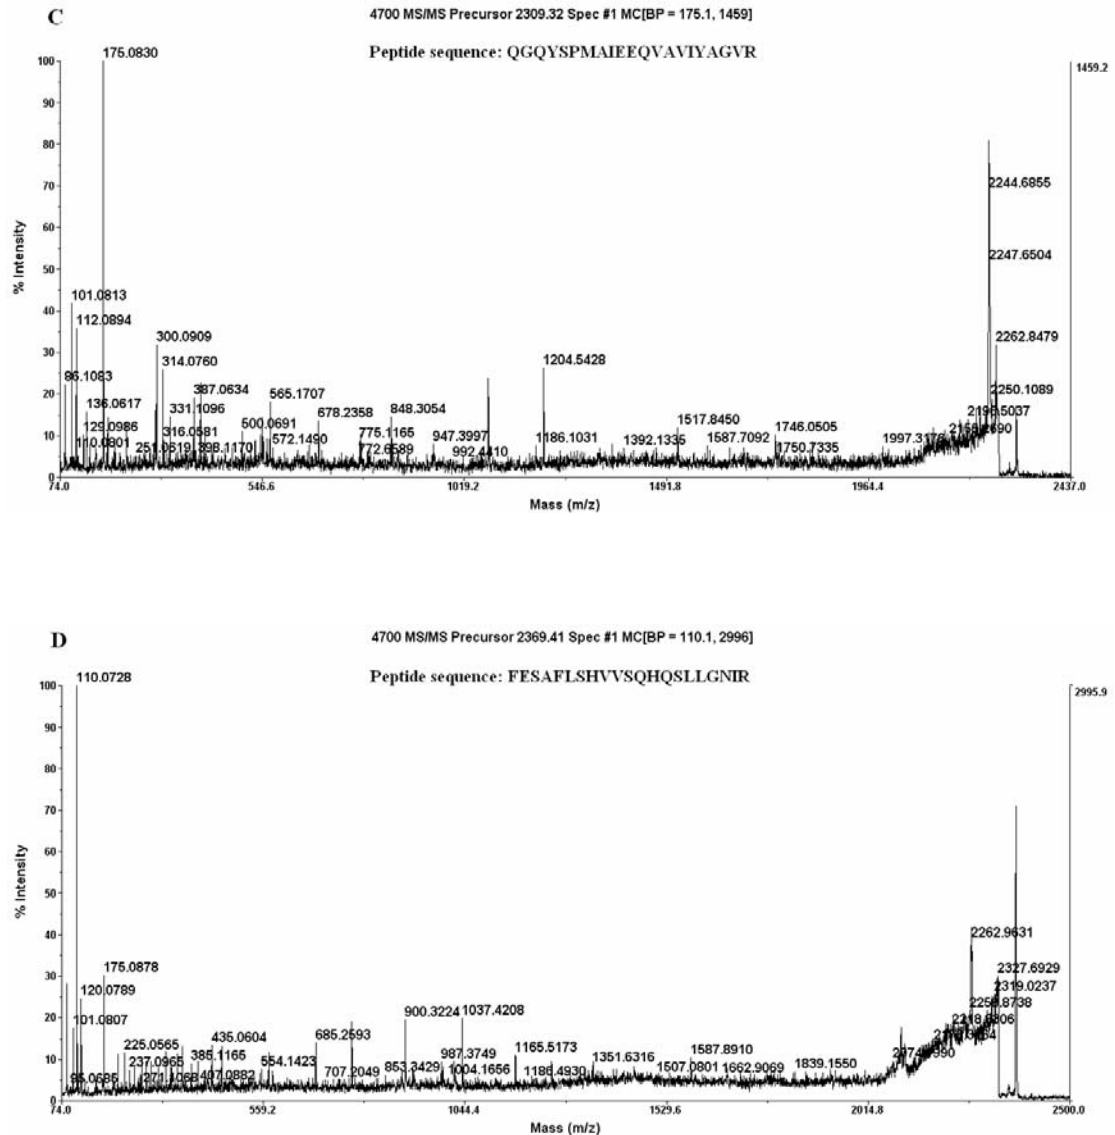

Additional file 3. F1-ATPase protein identified by PMF and MS/MS. (A) MALDI peptide mass fingerprint of F1-ATPase. \* indicated matched peptides, some of them were further identified by MS/MS. (B) MS/MS profile of the peptide with a mass of 1438.94 Da. The ion score was 25. (C) MS/MS profile of the peptide with a mass of 2309.32 Da. The ion score was 94. (D) MS/MS profile of the peptide with a mass of 2369.41 Da. The ion score was 113.
